# Supplementary material
Source: publisher site journal article supplement (https://www.dovepress.com/article/112932)
Supplement: Supplementary file 1 [file get_supplementary_file.php]

# GENERAL PUBLIC VIEWS OF SPECIFIC MEDICINES RELATED SERVICES PROVIDED BY COMMUNITY PHARMACIES IN KENT

## PART A: YOUR USE OF MEDICINES AND PHARMACIES

1. How would you describe your general health at the moment?

- Very good     Good     Fair     Poor     Very poor

2. Do you take any prescribed medicines regularly?

- Yes, up to 4     Yes, between 5 and 8     Yes, more than 8     No, none

3. On average, how often did you go to a pharmacy for any reason?

- Once a week     Once a fortnight     Once a month  
 Once every 2 months     Once every 3 months     Once in the past 6 months  
 Never     Not sure     Other (specify).....

4. How often do you do the following things when you go to a pharmacy?

|                                                                                                | Always                   | Sometimes                | Never                    |
|------------------------------------------------------------------------------------------------|--------------------------|--------------------------|--------------------------|
| Have a prescription dispensed                                                                  | <input type="checkbox"/> | <input type="checkbox"/> | <input type="checkbox"/> |
| Buy medicines<br>(e.g. painkillers, things for hay fever or cold, etc...)                      | <input type="checkbox"/> | <input type="checkbox"/> | <input type="checkbox"/> |
| Buy dietary supplements<br>(e.g. vitamins, mineral etc...)                                     | <input type="checkbox"/> | <input type="checkbox"/> | <input type="checkbox"/> |
| Buy toiletries or beauty products<br>(e.g. toothpaste, shampoo, make-up, etc...)               | <input type="checkbox"/> | <input type="checkbox"/> | <input type="checkbox"/> |
| Get advice about medicines you have bought or had on a prescription                            | <input type="checkbox"/> | <input type="checkbox"/> | <input type="checkbox"/> |
| Get advice about minor health problems<br>(e.g. skin problems, upset stomach, viruses, etc...) | <input type="checkbox"/> | <input type="checkbox"/> | <input type="checkbox"/> |

5. Are you worried about any problems relating to medicines prescribed for you or anyone you care for?

- Yes     No

(If yes, please tell us about them here and then ask them how worried they are)

For each: indicate how worried you are eg are you very worried or just a bit worried)

6. If you were to experience any issues relating to your medicines, would you consider going to a pharmacy to get advice?

- Yes     No

(If not, can you tell me why not)

(If not specified, ask where they would go)

## PART B: PHARMACY SERVICES RELATED TO PRESCRIPTION MEDICINES

7. I am going to describe a number of pharmacy services, please tell me whether you have ever used each of the following services and whether you would be prepared to do this in the future. (Please answer both parts)

| Have you ever:                                                                                     | Have you ever done this?                                    | Would you be prepared to do this in future? |                          |                          |
|----------------------------------------------------------------------------------------------------|-------------------------------------------------------------|---------------------------------------------|--------------------------|--------------------------|
|                                                                                                    |                                                             | Yes                                         | Maybe                    | No                       |
| <b>been given advice about using medicines which you have just collected</b>                       |                                                             |                                             |                          |                          |
| a) in a private consultation room in the pharmacy                                                  | <input type="checkbox"/> Yes<br><input type="checkbox"/> No | <input type="checkbox"/>                    | <input type="checkbox"/> | <input type="checkbox"/> |
| b) in a quiet area of the pharmacy                                                                 | <input type="checkbox"/> Yes<br><input type="checkbox"/> No | <input type="checkbox"/>                    | <input type="checkbox"/> | <input type="checkbox"/> |
| c) across the pharmacy counter                                                                     | <input type="checkbox"/> Yes<br><input type="checkbox"/> No | <input type="checkbox"/>                    | <input type="checkbox"/> | <input type="checkbox"/> |
| <b>been given advice about using <u>new</u> medicines which you have just collected</b>            |                                                             |                                             |                          |                          |
| a) in a private consultation room in the pharmacy                                                  | <input type="checkbox"/> Yes<br><input type="checkbox"/> No | <input type="checkbox"/>                    | <input type="checkbox"/> | <input type="checkbox"/> |
| b) in a quiet area of the pharmacy                                                                 | <input type="checkbox"/> Yes<br><input type="checkbox"/> No | <input type="checkbox"/>                    | <input type="checkbox"/> | <input type="checkbox"/> |
| c) across the pharmacy counter                                                                     | <input type="checkbox"/> Yes<br><input type="checkbox"/> No | <input type="checkbox"/>                    | <input type="checkbox"/> | <input type="checkbox"/> |
| <b>had a discussion with a pharmacist about medicines</b>                                          |                                                             |                                             |                          |                          |
| a) because you were recently discharged from hospital                                              | <input type="checkbox"/> Yes<br><input type="checkbox"/> No | <input type="checkbox"/>                    | <input type="checkbox"/> | <input type="checkbox"/> |
| b) because you were taking a particular medicine                                                   | <input type="checkbox"/> Yes<br><input type="checkbox"/> No | <input type="checkbox"/>                    | <input type="checkbox"/> | <input type="checkbox"/> |
| <b>had a general review of your medicines use with a pharmacist in a private consultation room</b> |                                                             |                                             |                          |                          |
| <b>given a pharmacist permission to</b>                                                            |                                                             |                                             |                          |                          |
| a) telephone you to follow up about advice already provided                                        | <input type="checkbox"/> Yes<br><input type="checkbox"/> No | <input type="checkbox"/>                    | <input type="checkbox"/> | <input type="checkbox"/> |
| b) share your information with the NHS organisation                                                | <input type="checkbox"/> Yes<br><input type="checkbox"/> No | <input type="checkbox"/>                    | <input type="checkbox"/> | <input type="checkbox"/> |
| c) share your information with your doctor                                                         | <input type="checkbox"/> Yes<br><input type="checkbox"/> No | <input type="checkbox"/>                    | <input type="checkbox"/> | <input type="checkbox"/> |

8. Would any of the following reasons make you consider using one of the services we have just discussed?

|                                                    | Yes                      | No                       | Not sure                 |
|----------------------------------------------------|--------------------------|--------------------------|--------------------------|
| The pharmacist asked me                            | <input type="checkbox"/> | <input type="checkbox"/> | <input type="checkbox"/> |
| I wanted to help the pharmacist out                | <input type="checkbox"/> | <input type="checkbox"/> | <input type="checkbox"/> |
| I had problems with my medicines                   | <input type="checkbox"/> | <input type="checkbox"/> | <input type="checkbox"/> |
| I thought that the pharmacist could help me        | <input type="checkbox"/> | <input type="checkbox"/> | <input type="checkbox"/> |
| I wanted to know more about my medicines generally | <input type="checkbox"/> | <input type="checkbox"/> | <input type="checkbox"/> |
| I had time                                         | <input type="checkbox"/> | <input type="checkbox"/> | <input type="checkbox"/> |

*Other reason – please tell us here*

9. I want to find out about your expectation and experience of pharmacy services. Please tell me what you would expect if you received advice from a pharmacist about your medicines and whether you have experienced this. *This question has two parts, please answer both parts.*

| On getting advice about my prescribed medicines I would expect that                | Would you expect this?   |                          |                          | Have you experienced this?                                   |
|------------------------------------------------------------------------------------|--------------------------|--------------------------|--------------------------|--------------------------------------------------------------|
|                                                                                    | Yes                      | No                       | May be                   |                                                              |
| the pharmacist helped me to know more about my medicines                           | <input type="checkbox"/> | <input type="checkbox"/> | <input type="checkbox"/> | <input type="checkbox"/> Yes*<br><input type="checkbox"/> No |
| the pharmacist helped me to understand better how to use my medicines              | <input type="checkbox"/> | <input type="checkbox"/> | <input type="checkbox"/> | <input type="checkbox"/> Yes*<br><input type="checkbox"/> No |
| the pharmacist would encourage me to take my medicines as the doctor expects me to | <input type="checkbox"/> | <input type="checkbox"/> | <input type="checkbox"/> | <input type="checkbox"/> Yes*<br><input type="checkbox"/> No |
| the pharmacist helped me to sort out any problems with my prescription medicines   | <input type="checkbox"/> | <input type="checkbox"/> | <input type="checkbox"/> | <input type="checkbox"/> Yes*<br><input type="checkbox"/> No |
| I would need to order fewer medicines or do so less often                          | <input type="checkbox"/> | <input type="checkbox"/> | <input type="checkbox"/> | <input type="checkbox"/> Yes*<br><input type="checkbox"/> No |
| I got some benefit from talking to the pharmacist                                  | <input type="checkbox"/> | <input type="checkbox"/> | <input type="checkbox"/> | <input type="checkbox"/> Yes*<br><input type="checkbox"/> No |

*\* Continue with the following three statements if you had experienced any of the above ...*

**As a result of the experiences you indicated just now, would you say that:**

|                                                                       | Yes*                     | No                       |
|-----------------------------------------------------------------------|--------------------------|--------------------------|
| a) my relationship with the pharmacist changed                        | <input type="checkbox"/> | <input type="checkbox"/> |
| b) my view of the pharmacist as a health care professional changed    | <input type="checkbox"/> | <input type="checkbox"/> |
| c) my awareness of the pharmacist's knowledge about medicines changed | <input type="checkbox"/> | <input type="checkbox"/> |

**\*If yes to any or all of questions a to c above; explore and record here**

.....

10. Have you ever heard of the services which some pharmacists provide about medicines?

New medicines service       No       Yes

Medicines use review service       No       Yes

## PART C: YOUR PREFERENCES FOR PHARMACIES

11. On a visit to the pharmacy, what is the longest time that you would be happy to wait to talk to the Pharmacist?
- No more than 5 minutes                       No more than 15 minutes  
 No more than 10 minutes                       More than 15 minutes
12. On a visit to the pharmacy, what is the longest time that you would be happy to talk to the Pharmacist about your medicines ?
- No more than 5 minutes                       No more than 30 minutes  
 No more than 15 minutes                       More than 30 minutes
13. Would you be happy to make an appointment for a return visit, if
- a) the pharmacist did not have time to speak to you straight away?
- Yes     No
- b) a more detailed discussion or a follow up was necessary?
- Yes     No
14. If you do have to make an appointment to talk to the Pharmacist, how long would you be happy to wait for?
- No more than 4 hours                       No more than 1 day                       No more than 4 days  
 No more than 1 week                       Longer than 1 week
15. Please tell us what you think about the following statements, they are about the type of pharmacy you would choose to go to, to get advice and information about your new or continuing medicines

|                                                                           | Agree                    | Disagree                 | Don't mind /<br>Not sure |
|---------------------------------------------------------------------------|--------------------------|--------------------------|--------------------------|
| I prefer to use the <b>same</b> pharmacy every time                       | <input type="checkbox"/> | <input type="checkbox"/> | <input type="checkbox"/> |
| I prefer to use a pharmacy <b>owned by a large company</b>                | <input type="checkbox"/> | <input type="checkbox"/> | <input type="checkbox"/> |
| I prefer to use a pharmacy <b>owned by the pharmacist who works there</b> | <input type="checkbox"/> | <input type="checkbox"/> | <input type="checkbox"/> |
| I prefer to use a pharmacy in a <b>supermarket</b>                        | <input type="checkbox"/> | <input type="checkbox"/> | <input type="checkbox"/> |
| I prefer to use a pharmacy near to where I <b>live</b>                    | <input type="checkbox"/> | <input type="checkbox"/> | <input type="checkbox"/> |
| I prefer to use a pharmacy near to where I <b>work</b>                    | <input type="checkbox"/> | <input type="checkbox"/> | <input type="checkbox"/> |
| I prefer to use a pharmacy near to my <b>doctor's surgery</b>             | <input type="checkbox"/> | <input type="checkbox"/> | <input type="checkbox"/> |
| I need a pharmacy that is <b>open in the evening</b>                      | <input type="checkbox"/> | <input type="checkbox"/> | <input type="checkbox"/> |
| I need a pharmacy that is <b>open on a Saturday</b>                       | <input type="checkbox"/> | <input type="checkbox"/> | <input type="checkbox"/> |
| I need a pharmacy that is <b>open on a Sunday</b>                         | <input type="checkbox"/> | <input type="checkbox"/> | <input type="checkbox"/> |

**16. I want to find out your preferences for the type of pharmacy where you will use pharmacy services. Which of the following factors would you take into consideration when deciding whether to use services about prescription medicines in a pharmacy.**

|                                                                                                                                        | Agree                    | Disagree                 | Don't mind /<br>Not sure |
|----------------------------------------------------------------------------------------------------------------------------------------|--------------------------|--------------------------|--------------------------|
| I prefer to use a pharmacy where I <b>recognise the pharmacist</b>                                                                     | <input type="checkbox"/> | <input type="checkbox"/> | <input type="checkbox"/> |
| I prefer to use a pharmacy where the <b>pharmacist knows who I am</b>                                                                  | <input type="checkbox"/> | <input type="checkbox"/> | <input type="checkbox"/> |
| I prefer to talk to a pharmacist who is the <b>same sex</b> as me                                                                      | <input type="checkbox"/> | <input type="checkbox"/> | <input type="checkbox"/> |
| I prefer to use a pharmacy where the <b>pharmacist appears approachable</b>                                                            | <input type="checkbox"/> | <input type="checkbox"/> | <input type="checkbox"/> |
| I prefer to talk to a <b>pharmacist who has previously given me time</b>                                                               | <input type="checkbox"/> | <input type="checkbox"/> | <input type="checkbox"/> |
| I prefer <b>not to interrupt</b> a pharmacist who appears to be <b>busy in the dispensary</b>                                          | <input type="checkbox"/> | <input type="checkbox"/> | <input type="checkbox"/> |
| I prefer <b>not to speak</b> to the pharmacist where other <b>people can overhear my conversation</b>                                  | <input type="checkbox"/> | <input type="checkbox"/> | <input type="checkbox"/> |
| I prefer to talk to a pharmacist in a <b>private room</b>                                                                              | <input type="checkbox"/> | <input type="checkbox"/> | <input type="checkbox"/> |
| I trust the <b>pharmacist</b> to keep my personal information <b>confidential</b>                                                      | <input type="checkbox"/> | <input type="checkbox"/> | <input type="checkbox"/> |
| I prefer to use a pharmacy where they have <b>previously been able to meet my needs</b>                                                | <input type="checkbox"/> | <input type="checkbox"/> | <input type="checkbox"/> |
| I prefer to use a pharmacy that I believe has a <b>good working relationship with my GP surgery</b> (or other healthcare professional) | <input type="checkbox"/> | <input type="checkbox"/> | <input type="checkbox"/> |
| I prefer <b>not to share my reasons</b> for asking to speak with the pharmacist <b>with pharmacy staff</b>                             | <input type="checkbox"/> | <input type="checkbox"/> | <input type="checkbox"/> |
| I prefer to use a pharmacy where the <b>pharmacy staff make it easy for me to speak to the pharmacist</b>                              | <input type="checkbox"/> | <input type="checkbox"/> | <input type="checkbox"/> |
| I prefer to use a pharmacy where <b>pharmacy staff know me</b>                                                                         | <input type="checkbox"/> | <input type="checkbox"/> | <input type="checkbox"/> |
| I trust the <b>pharmacy staff</b> to keep my personal information <b>confidential</b>                                                  | <input type="checkbox"/> | <input type="checkbox"/> | <input type="checkbox"/> |

**17. Is there anything else that might affect your choice of pharmacy?**

Yes       No       Not sure

If yes, can you specify what.....

## PART D: YOUR VIEWS ON PROMOTION OF PHARMACY SERVICES

18. Please read the list below of the different ways that you might find out about a pharmacy service. For each of them, please tell us whether or not promoting pharmacy services in that way would encourage you to use them.

|                                                                       | Would promoting services in this way encourage you to use them? |                          |                          |
|-----------------------------------------------------------------------|-----------------------------------------------------------------|--------------------------|--------------------------|
|                                                                       | Yes                                                             | Maybe                    | No                       |
| Advertised on a <b>poster/leaflet</b> in a <b>public place</b>        | <input type="checkbox"/>                                        | <input type="checkbox"/> | <input type="checkbox"/> |
| Advertised on a <b>leaflet</b> dropped through <b>my door</b>         | <input type="checkbox"/>                                        | <input type="checkbox"/> | <input type="checkbox"/> |
| Advertised in a <b>local newspaper/local free paper</b>               | <input type="checkbox"/>                                        | <input type="checkbox"/> | <input type="checkbox"/> |
| Advertised on a <b>local radio station</b>                            | <input type="checkbox"/>                                        | <input type="checkbox"/> | <input type="checkbox"/> |
| Advertised on a <b>local TV channel</b>                               | <input type="checkbox"/>                                        | <input type="checkbox"/> | <input type="checkbox"/> |
| Advertised by sending information to my <b>email</b>                  | <input type="checkbox"/>                                        | <input type="checkbox"/> | <input type="checkbox"/> |
| Advertised on a <b>poster/leaflet</b> in a <b>pharmacy</b>            | <input type="checkbox"/>                                        | <input type="checkbox"/> | <input type="checkbox"/> |
| Advertised on a <b>poster/leaflet</b> in a <b>doctor surgery</b>      | <input type="checkbox"/>                                        | <input type="checkbox"/> | <input type="checkbox"/> |
| Included on a <b>healthcare website</b><br>(e.g. <i>NHS choices</i> ) | <input type="checkbox"/>                                        | <input type="checkbox"/> | <input type="checkbox"/> |
| Recommended by my <b>family</b> or <b>friends</b>                     | <input type="checkbox"/>                                        | <input type="checkbox"/> | <input type="checkbox"/> |
| Recommended by the <b>pharmacist</b> or <b>pharmacy staff</b>         | <input type="checkbox"/>                                        | <input type="checkbox"/> | <input type="checkbox"/> |
| Recommended by my <b>doctor</b> or <b>another health professional</b> | <input type="checkbox"/>                                        | <input type="checkbox"/> | <input type="checkbox"/> |

19. Do you have any other comments about promoting pharmacy services?

Yes       No

Record comments here .....

## PART E: ABOUT YOU

This part has some questions about you to help us understand how different types of people think.

### 20. Are you

- Male  Female

### 21. What is your age group?

- 24 and under  25-34  35-44  
 45-54  55-64  65 and Over

### 22. Which ethnic group best describe you? (Please tick **one** box only)

- White  Mixed  Asian or Asian British  
 Black or Black British  Chinese  Other .....

### 23. What is the highest level of education you have completed?

- None  Primary/ Few years secondary  
 Secondary completed  College/Further education  
 Bachelor degree  Higher degree  
 Still studying (Please tell us what level are you in) .....

### 24. What is your current working status?

- Full-time  Part-time  Retired  Not working

### 25. What is your current or most recent job? (Please tick **one** that best describes your occupation)

- Higher managerial and professional occupations  
(e.g. manager or director of a large institution, engineer, doctor, lawyer etc...)  
 Lower managerial and professional occupation  
(e.g. nurse, teaching professionals, scientific technician, financial officer, sport player etc...)  
 Intermediate occupation  
(e.g. electronic technician, teaching assistant, secretary etc...)  
 Small employers and own account workers  
(e.g. shopkeeper, beauty salon manager, taxi/cab driver etc...)  
 Lower supervisory occupation and technical occupation  
(e.g. care worker, cleaning supervisor, transport operative etc...)  
 Semi-routine occupation  
(e.g. fitness instructor, receptionist, , road builder, crane driver etc...)  
 Routine occupation  
(e.g. cleaner, packer, hairdresser, bar staff, butcher, florist etc...)  
 Never worked and long-term unemployed  
 Other (Please tell us here) .....

### 26. Please tell us your full postcode (we will **not** contact you or pass your details on to anyone else)

Thank you very much for taking the time to complete this survey.  
Your ideas/opinions will be very important in helping to improve the quality of services provided in our pharmacies.

# medway school of pharmacy

## Community Pharmacists' views and experience of Pharmacy based medicines advisory services such as Medicines Use Reviews (MURs) and the New Medicines Service (NMS)

This questionnaire is divided into 5 sections, which focus on:

- You and the Pharmacy that you are working in today
- Your views on patient perceptions and experiences of pharmacy based medicines advisory services
- Your views and experiences of pharmacy based medicines advisory services
- Patient preferences for pharmacies offering medicines advisory services
- Your views on the promotion of pharmacy based medicines advisory services

### Instructions for participants

- All questions relate to the pharmacy you are working in today
- Please answer all sections of the questionnaire
- Please answer the questions by ticking the appropriate box or writing in the space provided. If you do not wish to answer a particular question, please leave it blank and continue to the next question.
- Please return your completed questionnaire in the freepost envelope provided.

All the information that you provide on the questionnaire **will remain anonymous**. A code number has been included on your questionnaire only so that we can follow up pharmacists who do not return their questionnaire.

***Thank you for your help***

### Questionnaire Number

This number will only be used to follow-up non-responders

|  |  |  |
|--|--|--|
|  |  |  |
|--|--|--|



## Section 1: About you and the Pharmacy that you are working in today

### About You:

1. What is your year of birth?

19\_\_

2. Are you?

Male

Female

3. In which year did you register as a Pharmacist in Great Britain?

4. What is your role in the Pharmacy?

Manager/ Sole Pharmacist

Additional Pharmacist

Locum

Superintendent

5. Do you hold any postgraduate qualifications or special professional interests?

Yes

No

If yes please describe:

### About the Pharmacy:

6. Indicate which of the following represents the size of the organisation that owns the pharmacy?

*(Please tick the box which most closely represents your pharmacy)*

Independent/ sole ownership

Medium chain (11-30 pharmacies)

Small chain (2-10 pharmacies)

Large multiple (31 or more pharmacies)

7. Where is the Pharmacy located?

*(Please tick the box which most closely represents your pharmacy)*

High Street (town/ suburban)

Supermarket

Shopping centre (precinct in town)

Rural/ Village

Shopping Centre (out of town)

Attached to GP surgery

Other (please state)

8. Is your pharmacy open? *(please tick all that apply)*

In the evening (after 6pm)

All day Saturday

Saturday half-day

On Sundays

9. Would you describe your average prescription volume as .....

Low (< 2500 items per month)

Average (2500-5000 items per month)

High (>5000 items per month)

10. For Medicine Use Reviews (MURs)

If this information isn't readily available, please leave blank and proceed to the next question.

In the last month, approximately how many MURs (including targeted MURs) were undertaken in your pharmacy?

How many of these were targeted MURs?

Thinking of last month's targeted MURs approximately how were they divided?  
*For example if your targeted MURs were equally distributed between the 3 categories please write 33% in each box.*

Respiratory diseases

 %

Recent discharge from hospital

 %

High risk medicines  
(NSAIDs, anticoagulants, antiplatelets, diuretics)

 %

On average how long does an MUR consultation take?

minutes

11. For the New Medicine Service (NMS)

In the last month, approximately how many patients were **recruited** for NMS in your pharmacy?

In the last month, approximately how many NMS reviews were **completed** in your pharmacy?

On average how long do NMS consultations take?

a) NMS recruitment consultation

minutes

b) NMS recruitment consultation

minutes

c) NMS recruitment consultation

minutes

## Section 2: YOUR VIEWS on PATIENT perceptions and experiences of pharmacy based medicines advisory services

12. How many of your patients do you think are aware of the MUR service?

Most  Less than half

Approximately half  Very few

13. In your opinion, when a patient agrees to have an MUR do they know what the purpose of this service is?

Yes  No  Not sure

14. How many of your patients do you think are aware of the NMS service?

Most  Less than half

Approximately half  Very few

15. In your opinion, when a patient agrees to have an NMS consultation do they know what the purpose of this service is?

Yes  No  Not sure

16. When a patient agrees to an MUR/ NMS why do you think that they do this?

(please indicate whether you agree or disagree with each statement)

|                                                              | Agree                    | Not sure                 | Disagree                 |
|--------------------------------------------------------------|--------------------------|--------------------------|--------------------------|
| They are entitled to receive this free service               | <input type="checkbox"/> | <input type="checkbox"/> | <input type="checkbox"/> |
| The pharmacist asked them to                                 | <input type="checkbox"/> | <input type="checkbox"/> | <input type="checkbox"/> |
| The Pharmacist needed to speak to them about their medicines | <input type="checkbox"/> | <input type="checkbox"/> | <input type="checkbox"/> |
| They wanted to help the pharmacist out                       | <input type="checkbox"/> | <input type="checkbox"/> | <input type="checkbox"/> |
| They had problems with their medicines                       | <input type="checkbox"/> | <input type="checkbox"/> | <input type="checkbox"/> |
| They thought that it would benefit them in some way          | <input type="checkbox"/> | <input type="checkbox"/> | <input type="checkbox"/> |
| They had specific questions about their medicines            | <input type="checkbox"/> | <input type="checkbox"/> | <input type="checkbox"/> |
| They wanted to know more about their medicines generally     | <input type="checkbox"/> | <input type="checkbox"/> | <input type="checkbox"/> |
| They had time                                                | <input type="checkbox"/> | <input type="checkbox"/> | <input type="checkbox"/> |
| <i>Other reason – please tell us here</i>                    |                          |                          |                          |

17. We want to find out how **you think patients could benefit** from an MUR or NMS consultation and from your experience of conducting an MUR/ NMS **whether you think that these potential benefits are realised**

| On getting advice about prescribed medicines during an MUR or the NMS |     | How patients could expect to benefit from the consultation |                          |                          | How patients actually benefit from the consultation |                          |                          |
|-----------------------------------------------------------------------|-----|------------------------------------------------------------|--------------------------|--------------------------|-----------------------------------------------------|--------------------------|--------------------------|
|                                                                       |     | Yes                                                        | Maybe                    | No                       | Yes                                                 | Maybe                    | No                       |
| the advice that patients receive is of value to them                  | MUR | <input type="checkbox"/>                                   | <input type="checkbox"/> | <input type="checkbox"/> | <input type="checkbox"/>                            | <input type="checkbox"/> | <input type="checkbox"/> |
|                                                                       | NMS | <input type="checkbox"/>                                   | <input type="checkbox"/> | <input type="checkbox"/> | <input type="checkbox"/>                            | <input type="checkbox"/> | <input type="checkbox"/> |
| patients know more about their medicines                              | MUR | <input type="checkbox"/>                                   | <input type="checkbox"/> | <input type="checkbox"/> | <input type="checkbox"/>                            | <input type="checkbox"/> | <input type="checkbox"/> |
|                                                                       | NMS | <input type="checkbox"/>                                   | <input type="checkbox"/> | <input type="checkbox"/> | <input type="checkbox"/>                            | <input type="checkbox"/> | <input type="checkbox"/> |
| patients understand better how to use their medicines                 | MUR | <input type="checkbox"/>                                   | <input type="checkbox"/> | <input type="checkbox"/> | <input type="checkbox"/>                            | <input type="checkbox"/> | <input type="checkbox"/> |
|                                                                       | NMS | <input type="checkbox"/>                                   | <input type="checkbox"/> | <input type="checkbox"/> | <input type="checkbox"/>                            | <input type="checkbox"/> | <input type="checkbox"/> |
| patients are more likely to adhere to their medicines                 | MUR | <input type="checkbox"/>                                   | <input type="checkbox"/> | <input type="checkbox"/> | <input type="checkbox"/>                            | <input type="checkbox"/> | <input type="checkbox"/> |
|                                                                       | NMS | <input type="checkbox"/>                                   | <input type="checkbox"/> | <input type="checkbox"/> | <input type="checkbox"/>                            | <input type="checkbox"/> | <input type="checkbox"/> |
| any problems with their prescription medicines can be sorted out      | MUR | <input type="checkbox"/>                                   | <input type="checkbox"/> | <input type="checkbox"/> | <input type="checkbox"/>                            | <input type="checkbox"/> | <input type="checkbox"/> |
|                                                                       | NMS | <input type="checkbox"/>                                   | <input type="checkbox"/> | <input type="checkbox"/> | <input type="checkbox"/>                            | <input type="checkbox"/> | <input type="checkbox"/> |
| patients would stockpile or waste fewer medicines                     | MUR | <input type="checkbox"/>                                   | <input type="checkbox"/> | <input type="checkbox"/> | <input type="checkbox"/>                            | <input type="checkbox"/> | <input type="checkbox"/> |
|                                                                       | NMS | <input type="checkbox"/>                                   | <input type="checkbox"/> | <input type="checkbox"/> | <input type="checkbox"/>                            | <input type="checkbox"/> | <input type="checkbox"/> |
| patients would get some benefit talking to the pharmacist             | MUR | <input type="checkbox"/>                                   | <input type="checkbox"/> | <input type="checkbox"/> | <input type="checkbox"/>                            | <input type="checkbox"/> | <input type="checkbox"/> |
|                                                                       | NMS | <input type="checkbox"/>                                   | <input type="checkbox"/> | <input type="checkbox"/> | <input type="checkbox"/>                            | <input type="checkbox"/> | <input type="checkbox"/> |

From your experience of conducting MURs and the NMS,

18. Do you think that patients want these services?

Yes

No

Not sure

19. Do you think that patients need these services?

Yes

No

Not sure

20. Do you think that patients need a different service(s) to meet their needs?

Yes

No

Not sure

If Yes, please describe what different services are needed.

### Section 3: YOUR VIEWS and EXPERIENCE of pharmacy based medicines advisory services

21. We would also like to know what you think are the **possible benefits to you** of conducting MURs and the NMS and whether you think these benefits are actually achieved through the process

| Giving advice on prescribed medicines to patients within the MUR/ NMS consultation                                                 |     | What are the possible benefits to me from the consultation |                          |                          | What are the actual benefits I experience from the consultation |                          |                          |
|------------------------------------------------------------------------------------------------------------------------------------|-----|------------------------------------------------------------|--------------------------|--------------------------|-----------------------------------------------------------------|--------------------------|--------------------------|
|                                                                                                                                    |     | Yes                                                        | Maybe                    | No                       | Yes                                                             | Maybe                    | No                       |
| improves my relationship with patients                                                                                             | MUR | <input type="checkbox"/>                                   | <input type="checkbox"/> | <input type="checkbox"/> | <input type="checkbox"/>                                        | <input type="checkbox"/> | <input type="checkbox"/> |
|                                                                                                                                    | NMS | <input type="checkbox"/>                                   | <input type="checkbox"/> | <input type="checkbox"/> | <input type="checkbox"/>                                        | <input type="checkbox"/> | <input type="checkbox"/> |
| helps patients to realise that I am knowledgeable about medicines                                                                  | MUR | <input type="checkbox"/>                                   | <input type="checkbox"/> | <input type="checkbox"/> | <input type="checkbox"/>                                        | <input type="checkbox"/> | <input type="checkbox"/> |
|                                                                                                                                    | NMS | <input type="checkbox"/>                                   | <input type="checkbox"/> | <input type="checkbox"/> | <input type="checkbox"/>                                        | <input type="checkbox"/> | <input type="checkbox"/> |
| improves my relationship with GPs                                                                                                  | MUR | <input type="checkbox"/>                                   | <input type="checkbox"/> | <input type="checkbox"/> | <input type="checkbox"/>                                        | <input type="checkbox"/> | <input type="checkbox"/> |
|                                                                                                                                    | NMS | <input type="checkbox"/>                                   | <input type="checkbox"/> | <input type="checkbox"/> | <input type="checkbox"/>                                        | <input type="checkbox"/> | <input type="checkbox"/> |
| gives me professional satisfaction                                                                                                 | MUR | <input type="checkbox"/>                                   | <input type="checkbox"/> | <input type="checkbox"/> | <input type="checkbox"/>                                        | <input type="checkbox"/> | <input type="checkbox"/> |
|                                                                                                                                    | NMS | <input type="checkbox"/>                                   | <input type="checkbox"/> | <input type="checkbox"/> | <input type="checkbox"/>                                        | <input type="checkbox"/> | <input type="checkbox"/> |
| has positively changed patients' views on my role within the healthcare team                                                       | MUR | <input type="checkbox"/>                                   | <input type="checkbox"/> | <input type="checkbox"/> | <input type="checkbox"/>                                        | <input type="checkbox"/> | <input type="checkbox"/> |
|                                                                                                                                    | NMS | <input type="checkbox"/>                                   | <input type="checkbox"/> | <input type="checkbox"/> | <input type="checkbox"/>                                        | <input type="checkbox"/> | <input type="checkbox"/> |
| provides support to improve patient adherence which is valued by GPs                                                               | MUR | <input type="checkbox"/>                                   | <input type="checkbox"/> | <input type="checkbox"/> | <input type="checkbox"/>                                        | <input type="checkbox"/> | <input type="checkbox"/> |
|                                                                                                                                    | NMS | <input type="checkbox"/>                                   | <input type="checkbox"/> | <input type="checkbox"/> | <input type="checkbox"/>                                        | <input type="checkbox"/> | <input type="checkbox"/> |
| my consultation skills have improved through providing this service                                                                | MUR | <input type="checkbox"/>                                   | <input type="checkbox"/> | <input type="checkbox"/> | <input type="checkbox"/>                                        | <input type="checkbox"/> | <input type="checkbox"/> |
|                                                                                                                                    | NMS | <input type="checkbox"/>                                   | <input type="checkbox"/> | <input type="checkbox"/> | <input type="checkbox"/>                                        | <input type="checkbox"/> | <input type="checkbox"/> |
| enhances my professional reputation (as long as I provide a high quality service)                                                  | MUR | <input type="checkbox"/>                                   | <input type="checkbox"/> | <input type="checkbox"/> | <input type="checkbox"/>                                        | <input type="checkbox"/> | <input type="checkbox"/> |
|                                                                                                                                    | NMS | <input type="checkbox"/>                                   | <input type="checkbox"/> | <input type="checkbox"/> | <input type="checkbox"/>                                        | <input type="checkbox"/> | <input type="checkbox"/> |
| Patients having to sign a consent form confirming that they have received the service devalues the professional status of pharmacy | MUR | <input type="checkbox"/>                                   | <input type="checkbox"/> | <input type="checkbox"/> | <input type="checkbox"/>                                        | <input type="checkbox"/> | <input type="checkbox"/> |
|                                                                                                                                    | NMS | <input type="checkbox"/>                                   | <input type="checkbox"/> | <input type="checkbox"/> | <input type="checkbox"/>                                        | <input type="checkbox"/> | <input type="checkbox"/> |

## Section 4: PATIENT PREFERENCES for PHARMACIES offering medicines advisory services

The following questions ask what you think patient preferences are for pharmacies offering medicines advisory services such as MURs and the NMS.

22. What is the longest time that you think that a patient would be happy to wait to talk to the Pharmacist?

- No more than 5 minutes                       No more than 15 minutes  
 No more than 10 minutes                       More than 15 minutes

23. Do you think that patients are happy to make an appointment for a return visit if a more detailed discussion or a follow up was necessary or the pharmacist did not have time to speak to them straight away?

- Yes       No

24. How long do you think that a patient is happy to wait for an appointment to talk to the Pharmacist about their medicines?

- No more than 4 hours                       No more than 4 days                       Longer than 1 week  
 No more than 1 day                       No more than 1 week

25. What is the longest time that you think that a patient is happy to talk to the Pharmacist about their medicines?

- No more than 5 minutes                       No more than 30 minutes  
 No more than 15 minutes                       More than 30 minutes

26. Please tell us which of the following do you think patients consider when they choose where to go to get advice and information from a Pharmacist about their new or continuing medicines.

|                                                                                  | Agree                    | Don't mind /<br>Not sure | Disagree                 |
|----------------------------------------------------------------------------------|--------------------------|--------------------------|--------------------------|
| Patients prefer to use the <b>same</b> pharmacy every time                       | <input type="checkbox"/> | <input type="checkbox"/> | <input type="checkbox"/> |
| Patients prefer to use a pharmacy <b>owned by a large company</b>                | <input type="checkbox"/> | <input type="checkbox"/> | <input type="checkbox"/> |
| Patients prefer to use a pharmacy <b>owned by the pharmacist who works there</b> | <input type="checkbox"/> | <input type="checkbox"/> | <input type="checkbox"/> |
| Patients prefer to use a pharmacy in a <b>supermarket</b>                        | <input type="checkbox"/> | <input type="checkbox"/> | <input type="checkbox"/> |
| Patients prefer to use a pharmacy near to where they <b>live</b>                 | <input type="checkbox"/> | <input type="checkbox"/> | <input type="checkbox"/> |
| Patients prefer to use a pharmacy near to where they <b>work</b>                 | <input type="checkbox"/> | <input type="checkbox"/> | <input type="checkbox"/> |
| Patients prefer to use a pharmacy near to their <b>doctor's surgery</b>          | <input type="checkbox"/> | <input type="checkbox"/> | <input type="checkbox"/> |
| Patients prefer a pharmacy that is <b>open in the evening</b>                    | <input type="checkbox"/> | <input type="checkbox"/> | <input type="checkbox"/> |
| Patients prefer a pharmacy that is <b>open on a Saturday</b>                     | <input type="checkbox"/> | <input type="checkbox"/> | <input type="checkbox"/> |
| Patients prefer a pharmacy that is <b>open on a Sunday</b>                       | <input type="checkbox"/> | <input type="checkbox"/> | <input type="checkbox"/> |

**27. We would also like to find out which of the following factors you think that patients would take into consideration when deciding whether to use Pharmacy medicines advisory services.**

|                                                                                                                                                     | Agree                    | Don't mind /<br>Not sure | Disagree                 |
|-----------------------------------------------------------------------------------------------------------------------------------------------------|--------------------------|--------------------------|--------------------------|
| Patients prefer to use a pharmacy where they <b>know the pharmacist</b>                                                                             | <input type="checkbox"/> | <input type="checkbox"/> | <input type="checkbox"/> |
| Patients prefer to use a pharmacy where the <b>pharmacist knows who they are</b>                                                                    | <input type="checkbox"/> | <input type="checkbox"/> | <input type="checkbox"/> |
| Patients prefer to talk to a pharmacist who is the <b>same sex</b> as them                                                                          | <input type="checkbox"/> | <input type="checkbox"/> | <input type="checkbox"/> |
| Patients prefer to use a pharmacy where the <b>pharmacist appears approachable</b>                                                                  | <input type="checkbox"/> | <input type="checkbox"/> | <input type="checkbox"/> |
| Patients prefer to talk to a <b>pharmacist who has previously given them time</b>                                                                   | <input type="checkbox"/> | <input type="checkbox"/> | <input type="checkbox"/> |
| Patients prefer <b>not to interrupt</b> a pharmacist who appears to be <b>busy in the dispensary</b>                                                | <input type="checkbox"/> | <input type="checkbox"/> | <input type="checkbox"/> |
| Patients prefer <b>not to speak</b> to the pharmacist where other <b>people can overhear their conversation</b>                                     | <input type="checkbox"/> | <input type="checkbox"/> | <input type="checkbox"/> |
| Patients prefer to talk to a pharmacist in a <b>private room</b>                                                                                    | <input type="checkbox"/> | <input type="checkbox"/> | <input type="checkbox"/> |
| Patients know that they can trust the <b>pharmacist</b> to keep their personal information <b>confidential</b>                                      | <input type="checkbox"/> | <input type="checkbox"/> | <input type="checkbox"/> |
| Patients prefer to use a pharmacy where their needs have <b>previously been met</b>                                                                 | <input type="checkbox"/> | <input type="checkbox"/> | <input type="checkbox"/> |
| Patients prefer to use a pharmacy that they believe has a <b>good working relationship with their GP surgery</b> (or other healthcare professional) | <input type="checkbox"/> | <input type="checkbox"/> | <input type="checkbox"/> |
| Patients prefer <b>not to share their reasons</b> for asking to speak with the pharmacist <b>with pharmacy staff</b>                                | <input type="checkbox"/> | <input type="checkbox"/> | <input type="checkbox"/> |
| Patients prefer to use a pharmacy where the <b>pharmacy staff make it easy for them to speak to the pharmacist</b>                                  | <input type="checkbox"/> | <input type="checkbox"/> | <input type="checkbox"/> |
| Patients prefer to use a pharmacy where the <b>pharmacy staff know them</b>                                                                         | <input type="checkbox"/> | <input type="checkbox"/> | <input type="checkbox"/> |
| Patients trust the <b>pharmacy staff</b> to keep their personal information <b>confidential</b>                                                     | <input type="checkbox"/> | <input type="checkbox"/> | <input type="checkbox"/> |

**28. Is there anything else that you think might affect a patient's choice of pharmacy for medicines advisory services?**

- Yes       No

If yes, can you specify what

## Section 5: YOUR VIEWS on the PROMOTION of pharmacy based medicines advisory services

29. Please read the list below of the different ways that medicines advisory services could be promoted.

|                                                                          | Would promoting services in this way encourage patients to use them? |                          |                          |
|--------------------------------------------------------------------------|----------------------------------------------------------------------|--------------------------|--------------------------|
|                                                                          | Yes                                                                  | Maybe                    | No                       |
| Advertised on a <b>poster/leaflet</b> in a <b>public place</b>           | <input type="checkbox"/>                                             | <input type="checkbox"/> | <input type="checkbox"/> |
| Advertised on a <b>leaflet</b> dropped through <b>their door</b>         | <input type="checkbox"/>                                             | <input type="checkbox"/> | <input type="checkbox"/> |
| Advertised in a <b>local newspaper/local free paper</b>                  | <input type="checkbox"/>                                             | <input type="checkbox"/> | <input type="checkbox"/> |
| Advertised on a <b>local radio station</b>                               | <input type="checkbox"/>                                             | <input type="checkbox"/> | <input type="checkbox"/> |
| Advertised on a <b>local TV channel</b>                                  | <input type="checkbox"/>                                             | <input type="checkbox"/> | <input type="checkbox"/> |
| Advertised by sending information to their <b>email</b>                  | <input type="checkbox"/>                                             | <input type="checkbox"/> | <input type="checkbox"/> |
| Advertised on a <b>poster/leaflet</b> in a <b>pharmacy</b>               | <input type="checkbox"/>                                             | <input type="checkbox"/> | <input type="checkbox"/> |
| Advertised on a <b>poster/leaflet</b> in a <b>doctor surgery</b>         | <input type="checkbox"/>                                             | <input type="checkbox"/> | <input type="checkbox"/> |
| Included on a <b>healthcare website</b><br>( <i>e.g. NHS choices</i> )   | <input type="checkbox"/>                                             | <input type="checkbox"/> | <input type="checkbox"/> |
| Recommended by their <b>family</b> or <b>friends</b>                     | <input type="checkbox"/>                                             | <input type="checkbox"/> | <input type="checkbox"/> |
| Recommended by the <b>pharmacist</b> or <b>pharmacy staff</b>            | <input type="checkbox"/>                                             | <input type="checkbox"/> | <input type="checkbox"/> |
| Recommended by their <b>doctor</b> or <b>another health professional</b> | <input type="checkbox"/>                                             | <input type="checkbox"/> | <input type="checkbox"/> |

30. Please read the list below and decide whether you think they are responsible for promoting medicines advisory services.

|                                         | Yes                      | Maybe                    | No                       |                                             | Yes                      | Maybe                    | No                       |
|-----------------------------------------|--------------------------|--------------------------|--------------------------|---------------------------------------------|--------------------------|--------------------------|--------------------------|
| The Local NHS                           | <input type="checkbox"/> | <input type="checkbox"/> | <input type="checkbox"/> | National Pharmacy representatives e.g. PSNC | <input type="checkbox"/> | <input type="checkbox"/> | <input type="checkbox"/> |
| The NHS nationally                      | <input type="checkbox"/> | <input type="checkbox"/> | <input type="checkbox"/> | The pharmacy profession e.g. PSNC           | <input type="checkbox"/> | <input type="checkbox"/> | <input type="checkbox"/> |
| The Government                          | <input type="checkbox"/> | <input type="checkbox"/> | <input type="checkbox"/> | Individual GPs                              | <input type="checkbox"/> | <input type="checkbox"/> | <input type="checkbox"/> |
| Individual pharmacists                  | <input type="checkbox"/> | <input type="checkbox"/> | <input type="checkbox"/> | The Medical Profession                      | <input type="checkbox"/> | <input type="checkbox"/> | <input type="checkbox"/> |
| Local Pharmacy representatives e.g. LPC | <input type="checkbox"/> | <input type="checkbox"/> | <input type="checkbox"/> | Other (please specify)                      | <input type="checkbox"/> | <input type="checkbox"/> | <input type="checkbox"/> |



**31. Do you have any other comments about promoting pharmacy services?**

Yes

No

If yes, please record your comments here

**32. If you have any general comments on how pharmacists could best meet the medicines advisory needs of patients please write your comments here.**

**Many thanks!**

**Please return your completed questionnaire in the pre-paid envelope provided.**
